# Supplementary material for: Rapid and Sensitive Detection of Bartonella bacilliformis in Experimentally Infected Sand Flies by Loop-Mediated Isothermal Amplification (LAMP) of the Pap31 Gene
Source: PubMed Central journal article supplement (PMC4270493; doi:10.1371/journal.pntd.0003342), 2014-12-18
Supplement: pntd.0003342.s001.pdf [file pntd.0003342.s001.pdf]

# Flow diagram of a diagnostic accuracy of pap-31 LAMP assay compared to qPCR assay

Fully engorged sand flies after fed on *B. bacilliformis* spiked blood (n=74)

Being harvested from D1-9 post blood feeding

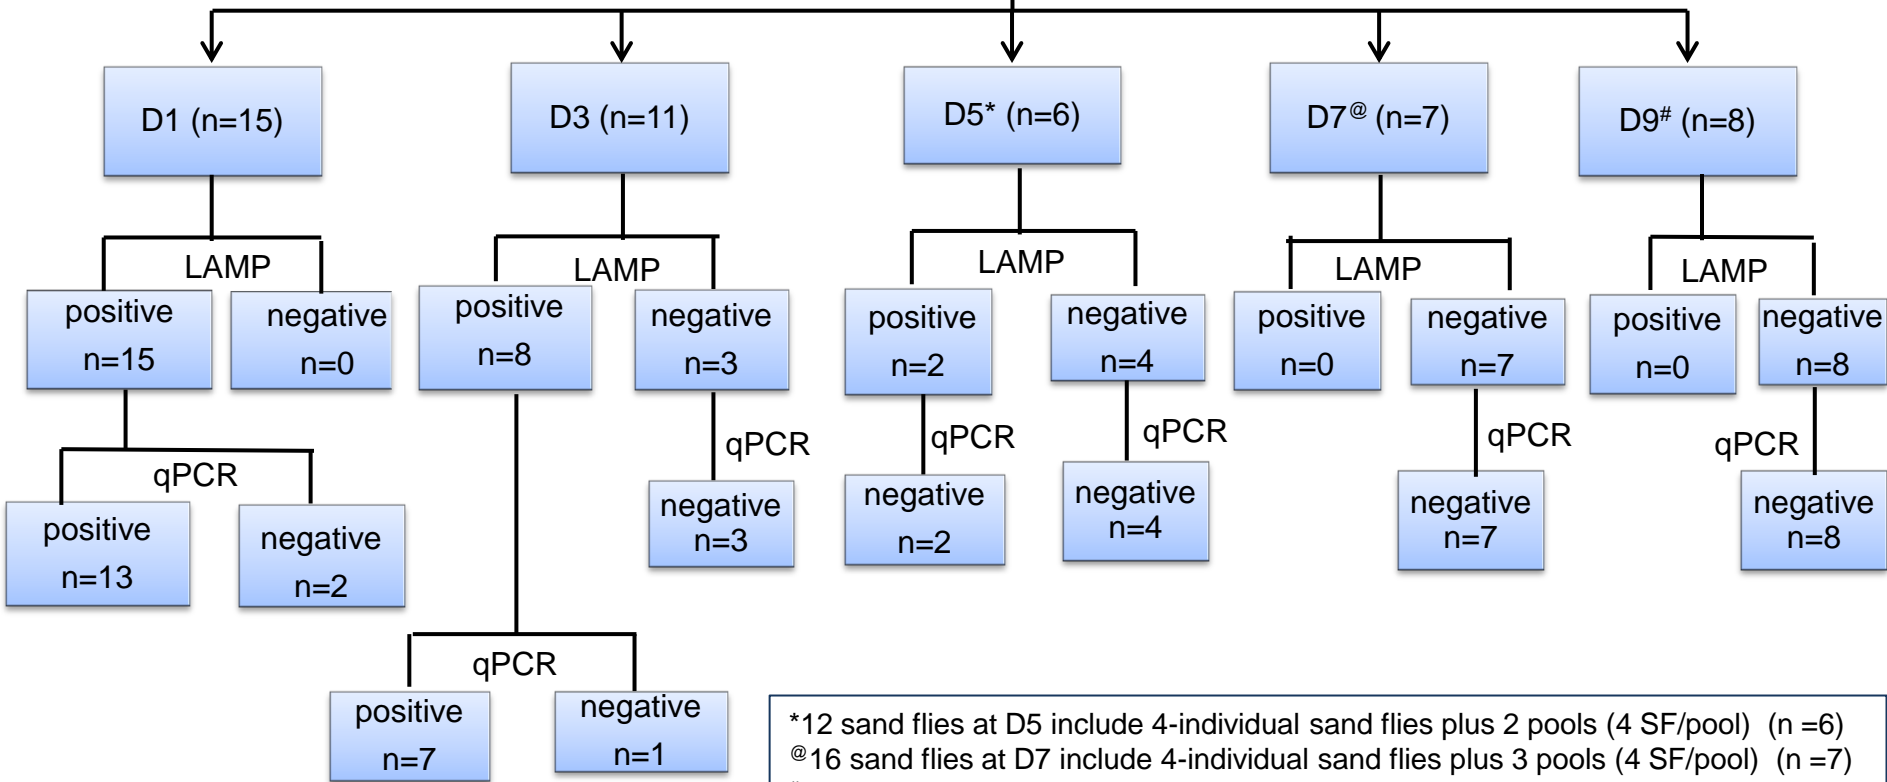

\*12 sand flies at D5 include 4-individual sand flies plus 2 pools (4 SF/pool) (n =6)  
 @16 sand flies at D7 include 4-individual sand flies plus 3 pools (4 SF/pool) (n =7)  
 # 20 sand flies at D9 include 4-individual sand flies plus 4 pools (4 SF/pool) (n =8)
